1  
2  
3  
4  
5  
6  
7  
8  
9  
10  
11  
12  
13  
14  
15  
16  
17  
18  
19  
20  
21  
22  
23  
24

# Feral pig exclusion fencing provides limited fish conservation value on tropical floodplains

N. J. Waltham<sup>1,2\*</sup>, J. Schaffer<sup>1</sup>

<sup>1</sup>Centre for Tropical Water and Aquatic Ecosystem Research (TropWATER),  
Freshwater Ecology Research Group, James Cook University, Queensland, 4811, Australia  
<sup>2</sup>Science for Integrated Coastal Ecosystem Management, College of Science and Engineering,  
James Cook University, Queensland, 4811, Australia

\*Corresponding Author Tel + 61 7 4781 4191; fax + 61 7 4781 5589  
E-mail address: [nathan.waltham@jcu.edu.au](mailto:nathan.waltham@jcu.edu.au)

Keywords: freshwater fish; wetlands; feral pigs; exclusion fences; floodplains; connectivity

Funding: This study is supported by the National Environment Science Program (Northern Australian Hub) awarded to CSIRO, James Cook University, and the Queensland Government.

Running header: Fish occupying tropical wetlands affected by feral pigs

25 **Abstract**

26 Efforts to protect and restore tropical wetlands impacted by feral pigs (*Sus scrofa*) in northern  
27 Australia have more recently included exclusion fences, an abatement response proposing  
28 fences improve wetland condition by protecting habitat for fish production and water quality.  
29 Here we tested: 1) whether the fish assemblage are similar in wetlands with and without  
30 fences; and 2) whether specific environmental processes influence fish composition differently  
31 between fenced and unfenced wetlands. Twenty-one floodplain and riverine wetlands in the  
32 Archer River catchment (Queensland) were surveyed during post-wet (June-August) and late-  
33 dry season (November-December) in 2016, 2017 and 2018, using a fyke soaked overnight  
34 (~14-15hrs). A total of 6,353 fish representing twenty-six species from 15 families were  
35 captured. There were no multivariate differences in fish assemblages between seasons, years  
36 and for fenced and unfenced wetlands (PERMANOVA, Pseudo-F <0.58,  $P < 0.68$ ). Late-dry  
37 season fish were considerably smaller compared to post-wet season: a strategy presumably to  
38 maximise rapid disposal following rain. At each wetland a calibrated Hydrolab was deployed  
39 (between 2-4 days, with 20min logging) in the epilimnion (0.2m), and revealed distinct diel  
40 water quality cycling of temperature, dissolved oxygen and pH (conductivity represented  
41 freshwater wetlands) which was more obvious in the late-dry season survey, because of  
42 extreme summer conditions. Water quality varied among wetlands, in terms of the daily  
43 amplitude, and extent of daily photosynthesis recovery, which highlights the need to consider  
44 local site conditions rather than applying general assumptions around water quality conditions  
45 for these types of wetlands examined here. Though many fish access (fenced and unfenced)  
46 wetlands during wet season connection, the seasonal effect of reduced water level conditions  
47 seems to be more over-improvised compared to whether fences are installed or not, as all  
48 wetlands supported few, juvenile, or no fish species because they had dried completely  
49 regardless of whether fences were present or not.

## 50 **Introduction**

51 Wetlands (palustrine and lacustrine) that are located on floodplains away from riverine  
52 channels support rich aquatic plant and fauna communities [1-3]. However, some point after  
53 peak flood connection, aquatic organisms occupying these wetlands begin to face a moving  
54 land-water margin, until connection is broken, at which point the remaining wetland  
55 waterbodies typically support a non-random assortment of species, including fish [4, 5]. The  
56 duration, timing and frequency that off channel wetlands maintain lateral pulse connection to  
57 primary rivers is an important determining factor in broader contribution to coastal fisheries  
58 production [6-9]. In addition to connection, environmental conditions become important  
59 including water quality [10], access to shelter to escape predation and available food resources  
60 [11, 12]. Efforts by managers to restore wetland ecosystem values is increasing, nevertheless  
61 access to data establishing success of these programs are limited, which becomes important  
62 when attempting to establish biodiversity returns for the funding investment made by  
63 government or private investor organisations [13-15].

64  
65 After floodplain wetlands begin receding and progressively disconnect from the main river  
66 channel, they become smaller and shallower [16] because of water loss via evaporation,  
67 groundwater recharge, or consumption by wildlife [17, 18]. In tropical north Australia,  
68 seasonal off channel wetlands are more pronounced owing to high evaporation rates, loss to  
69 groundwater [19], and in many situations waters quickly retract away from the banks and  
70 riparian shade [16]. At that point, it is thought that they become more prone to reduced water  
71 quality conditions - most notably reduced water depth [18], and high water temperatures [10,  
72 20]. This increases aquatic fauna exposure risks to acute and chronic thresholds [21, 22]. In  
73 the late-dry season, fish confined to isolated wetlands on floodplains therefore have very  
74 limited avoidance options [10], unlike other fauna such as the freshwater crab also occupying

75 seasonal tropical rivers in northern Australia, that will employ terrestrial re-location and access  
76 burrows when confronted with thermoregulation [23]. Fish must exploit available ephemeral  
77 aquatic habitats [24, 25], which can be specific to each wetland depending on orientation and  
78 location [26], depth and vegetation cover in the landscape [20], in order to survive until  
79 monsoonal rain reconnects overbank river networks again.

80  
81 Across northern Australia, feral pigs (*Sus scrofa*) contribute wide scale negative impacts on  
82 wetland vegetation assemblages, water quality, biological communities and wider ecological  
83 processes [27, 28]. Feral pigs utilise an omnivorous diet supported by foraging or digging  
84 plant roots, bulbs and other below ground vegetation material over terrestrial or wetland areas  
85 [29]. This feeding strategy has a massive impact on wetland aquatic vegetation [30], which  
86 gives rise to soil erosion and benthic sediment re-suspension, reduced water clarity and  
87 eutrophication which becomes particularly critical late-dry season. The fact that limited data  
88 exists on the impact that feral pigs contribute to wetlands [31-34], places a strain on the ability  
89 for land managers to quantify the consequences of pig destruction [35]. Conversely, a lack of  
90 baseline data means quantifying success following expensive mitigation efforts is difficult.

91  
92 Strategies focused on reducing or removing feral pigs from the landscape have been employed  
93 since their introduction to Australia [36], including poison baiting, aerial shooting, and  
94 trapping using specially constructed mesh cages [37]. Attempts to exclude feral pigs have also  
95 included installing exclusion fencing that border the wetland of interest. While advantages of  
96 installing fencing around wetlands has been examined only recently in Australia [32], those  
97 authors claim fencing might well be less effective particularly in situations where wetlands  
98 would normally dry during the dry season. Fencing is expensive to construct and maintain  
99 [37], but at the same time may prevent other non-target terrestrial fauna, such as kangaroos,  
100 from accessing wetlands which become particularly imperative late-dry season as regional

101 water points [35]. Other terrestrial species including birds, snakes and lizards, for example, are  
102 generally able to access wetlands, though access for freshwater turtles might be hindered [38].

103  
104 The aims were twofold: first to determine whether the model of non-randomness of fish stands  
105 here in wetlands, and secondly whether specific environmental conditions influence fish  
106 composition in wetlands with and without fences. These data are important and necessary  
107 given increasing government funding investment underway and planned in northern Australia  
108 for restoration of wetlands impacted by feral animals (including pigs) [10].

109

## 110 **Materials and methods**

### 111 **Ethics Statement**

112 This study was completed in accordance with the Queensland Animal Care and Protection Act  
113 2001, and JCU animal ethics permit number A2178.

114

### 115 **Description of Study System**

116 The Archer River catchment is located on Cape York Peninsula, north Queensland (Fig 1).

117 The head waters of the river rise in the McIlwraith range on the eastern side Cape York, where  
118 it flows and then enters Archer Bay on the western side of the Gulf of Carpentaria; along with  
119 the Watson and Ward Rivers. The catchment area is approximately 13,820 km<sup>2</sup>, which  
120 includes approximately 4% (510 km<sup>2</sup>) of wetland habitats

121 (<https://wetlandinfo.des.qld.gov.au/wetlands/facts-maps/basin-archer/>), such as estuarine

122 mangroves, salt flats and saltmarshes, wet heath swamps, floodplain grass sedge, herb and tree  
123 *Melaleuca* spp. swamps and riverine habitat. The lower region of the catchment includes part

124 of the Directory of Internationally Important Wetland network (i.e. nationally recognised status

125 for conservation and cultural value) that extends along much of the eastern Gulf of Carpentaria,

126 including the Archer Bay Aggregation, Northeast Karumba Plain Aggregation and Northern  
127 Holroyd Plain Aggregation. Two national parks are located in the catchment (KULLA  
128 (McIlwraith Range) National Park, and Oyala Thumotang National Park). Land use in the  
129 catchment is predominately grazing, with some mining activities planned in the next few years  
130 on the northern bank of the river (not within the area of this study).

131  
132 Rainfall is tropical monsoonal with a strongly seasonal pattern where between 60% and 90% of  
133 total annual rain occurs between November and February. Long-term rainfall records for the  
134 catchment revealed highest wet season rainfall occurred in 1989/1999 (2515 mm), while the  
135 lowest was 1960/1961 (563.5 mm) [39]. Total antecedent rainfall for the wet season prior  
136 (Nov 2014 to Feb 2015) to this survey was 1081 mm, which is below the 10<sup>th</sup> percentile for  
137 historical records. The wet seasons experienced through the years prior to this study (2010 to  
138 2015) were among the wettest on record, within the 95<sup>th</sup> percentile of the long-term data  
139 records. The low rainfall experienced during this study may have contributed to a short flood  
140 duration, and connection between study wetlands and the main Archer River, when compared  
141 to average or above average rainfall years (Fig 2).

142  
143 Twenty-one wetlands from the Archer River catchment were sampled for this project. These  
144 included both floodplain and riverine wetlands that were not on the main flow channels, but  
145 rather were on anabranches and flood channels that connect to the main channels only during  
146 high flow conditions. All wetlands have been historically damaged by pigs (and cattle to a  
147 lesser extent) for up to 160 years [40, 41], until recently, where a small number were fenced to  
148 abate feral pig and/or cattle from accessing wetlands, in accordance with the feral animal  
149 research and management agenda (to meet the objectives of traditional owners in the region) of  
150 both Kalan enterprises and Aak Puul Ngangtam, and their partner.

151 The characteristics of each wetland are summarised in Table S1. Here, sampling focused on  
152 two periods: 1) immediately following the wet season after disconnection between the river  
153 and wetlands (hereafter referred to as post wet season); and 2) late-dry season (hereafter late-  
154 dry) in 2016, 2017 and 2018. Each sampling campaign was completed over 14 days with six  
155 campaigns in total (post-wet and late-dry season in 2016, 2017 and 2018).

156

## 157 **Field Methods**

158 In each wetland, a calibrated high frequency Hydrolab multi-parameter logger (OTT Hydromet  
159 USA) was deployed (0.2m depth) for between 2 and 4 days to record epilimnion (0.2m) water  
160 temperature, dissolved oxygen (%), electrical conductivity and pH every 20mins; logging at  
161 this frequency provides explicit insight into diel changes in environmental water processes [20,  
162 22]. Weather conditions were fine with wetlands surveyed on the falling limb of the  
163 hydrograph.

164

165 Fish were collected in wetlands using a fyke net (0.8m opening, double 4m wing panels, 1mm  
166 stretch mesh) that was soaked overnight (approximately 14:00 to 09:00). Wetlands  
167 substantially impacted by feral pigs; secchi disk depth < 0.1m, no submerged or floating  
168 aquatic plants exist, while the fenced wetlands were generally deeper (up to 1.5m), and had  
169 submerged aquatic vegetation (Fig. 1). Fish were placed in a tub (~150L) temporarily,  
170 identified, measured (standard length, mm) and returned to the wetland alive in accordance  
171 with Australian laws (except for a small number that were kept food web studies, not shown  
172 here, under Australian law).

173

## 174 **Data Analysis**

175 There are two main biases in the sampling method here: 1) that the sampling technique  
176 potentially capture large numbers of schooling fish along the wetland margins; and 2) the fact

177 that predatory aquatic fauna including fish, snakes(macleays watersnakes (*Pseudoferania*  
178 *polylepis*), file snakes (*Acrochordus arafurae*)) and freshwater turtles (*Chelodina oblonga*,  
179 *Chelodina canni* and *Emydura s. worrelli*), were periodically trapped in the net for hours  
180 means that they could consume fish trapped in nets. To overcome these uncertainties, analyses  
181 were based on presence/absence of species. Presence/absence provide robust data when  
182 relative abundance are of doubtful validity because they treat species with a diversity of  
183 behaviours, trophic functions, and spatial distribute in a more equivalent way than fully  
184 quantitative techniques [42].

185  
186 Multivariate differences were examined using PERMANOVA (Anderson, 2001), using the  
187 Bray-Curtis similarities measure [43] with significance determined from 10,000 permutations  
188 of presence/absence transformation. Multivariate dispersion were tested using PERMDISP,  
189 however, homogeneity of variance could not be stabilized with transformation, and therefore  
190 untransformed data were used. Three factors where included: years (fixed), season (fixed); and  
191 fenced/unfenced (random). These factors were determined *a-prior* during study design.

192  
193 Spatial patterns in multivariate fish assemblage structure and the importance of explanatory  
194 data sets were analysed using a multivariate classification and regression tree (mCARTs) [44]  
195 package in R (version 3.4.4). Analysis was conducted using presence/absence transformed fish  
196 data for the 10 species that occurred in >20% of wetland sites (to remove rare species from this  
197 analysis). Selection of the final tree model was conducted using 10-fold cross validation, with  
198 a 1-SE tree; the smallest tree with cross validation error within 1 SE of the tree with the  
199 minimum cross validation error [45]. The relative importance of the explanatory variables  
200 were assessed to determine those with a high overall contribution to tree node split, with the  
201 best overall classifier being given a relative importance of 100%.

202



203 Kolmogorov-Smirnov (K-S) two-sample tests determined differences in the overall shape of  
204 fish body size distribution using a Bonferroni correction for multiple comparisons. K-S tests  
205 take into account differences between the location, skew, and kurtosis of frequency  
206 distributions; but do not identify which of these parameters are driving distributional  
207 differences. Therefore, we report the following characteristics of each body size distribution to  
208 further describe any differences found: mean, standard deviation (sd), minimum value (min),  
209 maximum value (max), the range of values, skewness, and kurtosis.

210

## 211 **Results**

### 212 **Hydrology and Wetland Water Quality**

213 Wet season rainfall totals in the Archer River catchment were low during the study period  
214 compared to the preceding years (Fig. 2), with rainfall within the 10<sup>th</sup> percentile for historical  
215 recordings held by the Australian Bureau of Meteorology. This means that some caution is  
216 necessary with interpretation of these data; namely that floodplain connectivity under higher  
217 rainfall years is likely to have a longer duration when compared to lower connection duration  
218 under the current rainfall conditions.

219

220 A full summary of water quality data are provided in Supplementary files (S1). In summary,  
221 water temperatures during the study period were generally about 26°C (Table 1). Minimum  
222 water temperature recordings as low as 18°C, while maximum temperatures occurred in  
223 November 2016 survey reached above 40°C for several hours of the day in some instances.  
224 The water column exhibited pronounced diel temperature periodicity; one or two hours after  
225 sunrise each day. Near-surface water temperatures began to rise at an almost linear rate for a  
226 period of  $8.0 \pm 0.5$  hours, generally reaching daily maxima during the middle of the afternoon.  
227 The mean daily temperature amplitude was 6.2°C (highest daily amplitude 9.6°C, lowest

228 4.4°C). For the remaining 16 hours of each day, near-surface water temperatures gradually  
229 declined reaching minimum conditions shortly after sunset.

230  
231 The electrical conductivity (EC) was very low (Table S1) during the post wet season surveys,  
232 while the late-dry season conductivity was generally higher in wetlands, a consequence of  
233 evapo-concentration. The lowest wetland in the catchment (AR08 located on the coastal  
234 floodplain) recorded the highest conductivity, suggesting connection with tidal water from the  
235 nearby estuary at some stage.

236  
237 There was evidence of cyclical daily DO fluctuations supporting the contention that biological  
238 diel periodicity processes were probably not significantly inhibited in all wetlands (Fig. 3). Daily  
239 minimum DO concentrations were low enough to suggest there was enough respiratory oxygen  
240 consumption to measurably affect water quality, particularly so at the pig impacted wetlands, but  
241 also during the late-dry season survey in November 2016. Dissolved oxygen (DO) seemed to  
242 reach daily minima conditions, well below the asphyxiation thresholds of sensitive fish species,  
243 in the early morning hours during all surveys. In the examples shown, after the morning low  
244 DO, conditions generally recovered to approximately 50%, but reaching a high of 100-160% in  
245 the late afternoon (before sunset).

246  
247 pH is also potentially subject to the same kinds of biogenic fluctuations as DO, due to  
248 consumption of carbon dioxide (i.e., carbonic acid) by aquatic plants and algae during the day  
249 (through photosynthesis), and net production of carbon dioxide at night. If respiratory oxygen  
250 consumption is predominant, DO concentrations are low and pH values are generally  
251 moderately acidic to neutral, which was the case for wetlands examined here. All  
252 photosynthetically active organisms utilise carbon dioxide as a preferred carbon source. Some  
253 species (including most green algae) are unable to photosynthesise if carbon dioxide is

254 unavailable, but there are other species (including most cyanobacteria and submerged  
255 macrophytes) which can utilise bicarbonate as an alternative carbon source. Carbon dioxide  
256 consumption causes pH to rise to values in the order of 8.6 to 8.7 (but that was not the case  
257 here during this survey period).

258

## 259 **Fish Community**

260 A total of 6,353 fish were captured, representing twenty-six species from 15 families (Table 1).  
261 The most common species was the freshwater glassfish (*Ambassis sp.*, 51% total catch),  
262 delicate blue-eyes (*Pseudomugil tenellus*, 11%), and northern purple-spot gudgeon (*Morgunda*  
263 *morgunda*, 9%). A greater number of fish species were caught in the post wet season survey,  
264 with a lower number captured during the late-dry season, including the northern purple-spot  
265 gudgeon (*Morgunda mogunda*), chequered rainbow fish (*Melanotaenia s. inornata*), and the  
266 empire gudgeon (*Hypselostris compressa*). In addition to fish, we captured a freshwater  
267 crayfish (*Cherax sp.*), macleays watersnakes (*Pseudoferania polylepis*) and freshwater turtles  
268 (*Chelodina oblonga* and *Emydura s. worrelli*) in most wetlands, notably during post wet  
269 season. Overall, there was no significant difference between seasons, fenced/unfenced  
270 wetlands and among years (PERMANOVA, Pseudo-F <0.58,  $P < 0.68$ ).

271

272 With a reduced list confined to dominant species, occurrence profiles for groups in the terminal  
273 branches of the mCART analysis (Fig. 5) show two initial wetland groups based on a split  
274 supported by region, with wetlands in the Coen (upper catchment) region separating from those  
275 wetlands in the coastal plains. Following the left branch there is inter-annual variation among  
276 wetlands, and a second terminal node based on whether wetlands were fenced in 2016, but not  
277 so in 2017 and 2018 data. Following the right branch (APN, coastal plains), the first node  
278 separates seasons, and following late-dry season wetlands further separate based on mean  
279 dissolved oxygen (~3.0%), and then mean temperature (~28.5°C). The post-wet season branch

280 appears to have more separation among data, with a separation based on mean water  
281 temperature (~26.5°C), years, and then finally dissolved oxygen (~4%).  
282  
283 Mean fish body size distributions differed between the three sample years (with fish for each  
284 wetland and survey pooled) (KS,  $P < 0.001$ , Table S2 – S5), with larger fish measured in 2017  
285 (50.5mm) compared to 2016 (38.7mm) and 2018 (31.6mm), despite the assemblages having  
286 similar size ranges. When comparing the overall fish size distribution by pooling years, post wet  
287 season fish were larger (44.9mm) when compared to fish in the late-dry season (39.7mm) (KS,  
288  $P < 0.01$ ). For some fish species such as the chequered rainbow fish (*Melanotaenia s. inornata*),  
289 the post wet season (32.5mm) was similar when compared to late-dry season (38.4mm) (KS,  $P$   
290 = 0.06, S3). In contrast, the northern purple-spot gudgeon (*Mogurnda mogurnda*) was larger  
291 post-wet season (52.8mm) compared to late-dry season (37.1mm) (KS,  $P < 0.01$ , Figure 5, S4).

292

## 293 **Discussion**

294 While installation of fences can protect terrestrial ecosystem services from feral impacts [46],  
295 however, in the case here abatement fences appear to offer little over-improvised fish  
296 additional value compared to those that are not fenced. Many fish indeed access both fenced  
297 and unfenced wetlands during wet season connection, however, the seasonal effects of reduced  
298 water level conditions and the loss of fish assemblage as the dry season progresses is a pattern  
299 that remained regardless of fencing. To this end, installation of expensive exclusion fences  
300 might not offer additional protection to fish species occupying these tropical floodplain  
301 wetlands. The same conclusion was reported by [32] where those authors surveyed strongly  
302 seasonal wetlands (similar to the wetlands here) elsewhere in northern Australia, and  
303 concluded that the seasonal dry down of wetlands ultimately prohibits the wetland contribution  
304 to future year successful fish recruitment.

305  
306 The low species richness in wetlands relative to the main Archer River channel might be a  
307 consequence of the frequency and duration of connection between wetlands and the main  
308 Archer river channel. The wet season rainfall immediately prior, and during this survey, was  
309 within the 10<sup>th</sup> percentile for historical records. In research elsewhere, a longer connection  
310 duration was shown to result in more fish present post wet season, and conceivably more  
311 species present late-dry season [6, 47]. Examples exist where longer connection between main  
312 river channels and wetlands contributes positively to fish growth rates and higher abundance  
313 and diversity of fish [24, 26, 48]. It is also possible that the field methods used here confound  
314 our ability to determine the full species composition in wetlands – this could be overcome by  
315 using additional survey techniques, including multi-panel gill nets, traps or electrofishing  
316 (though we attempted to electrofish these wetlands however, conductivity was too low to  
317 effectively use that method).

318  
319 An obvious characteristic of the fish data were larger, presumably adult, individuals following  
320 the disconnection of wetlands after the wet season compared to small individuals present in the  
321 late-dry season. On this basis, it is possible that the wetlands serve as important refugia for  
322 successful recruitment of freshwater fish, that adult fish remaining in the wetlands after  
323 disconnection are able to complete important life cycle stages. The fact that we did not catch  
324 large fish in the late-dry season suggests that adult fish might be lost as the dry season  
325 progress, consumed either by larger predators such as estuarine crocodiles (*Crocodylus*  
326 *porosus*), or birds feeding in the shallow waters. Wetlands are also popular feeding and  
327 roosting locations for birds [2, 49]; we observed a large number of birds at most wetlands in  
328 the late-dry season. The value of wetlands to wader birds is limited by the condition of  
329 wetlands [50, 51], but wetlands provide an important nutrient subsidy more broadly on  
330 seasonal floodplains [52, 53]. Hurd et al. (2017) postulates that differences in fish

331 communities among off channel waters could be more influenced by the presence of  
332 piscivorous predators which reduce or eliminate prey species, or even via a function of  
333 competitive exclusion may occur within fish guilds as resources diminish in the late-dry  
334 season. Examining this point could be achieved by investigating the species niche width [54,  
335 55] in drying waters by constructing food webs in individual waters to determine species  
336 ranges and changes with fencing treatment and comparing post wet season and late-dry season  
337 conditions.

338  
339 In the late-dry season for the few fish species present, juveniles dominated the catch regardless  
340 whether wetlands were fenced. Having small recruits in the late dry period might be an  
341 important strategy in maximising, quick, dispersal after connectivity with the onset of the wet  
342 season [56]. Moreover, late season conditions with no flow and warm conditions might favour  
343 larval development [57, 58]. *Melanotaeniid* rainbowfish, for example, have a flexible  
344 reproductive behaviour that is well adapt to deal with the vagaries of temporal variation in  
345 habitat conditions [59]. The same is true for both *Eleotrid gudgeon* species found here, with  
346 smaller recruits presumably ready for wide-scape distribution with the onset of seasonal flow.  
347 Pusey et al. (2018) provides a case that the reproduction success of freshwater fish in northern  
348 Australia could in fact hinge on antecedent flow patterns across the landscape, and that this  
349 flexibility ensures population level success [60]. This production strategy might be particularly  
350 pertinent given the below average summer rainfall totals witnessed during this survey,  
351 particularly when compared to previous years.

352  
353 As the dry season takes hold, water quality conditions progressively deteriorate owing mostly  
354 to increasing impact from rooting pigs accessing wetland vegetation. Generally, fenced  
355 wetlands change little in terms of water conditions (Figure 6). However, it is the late-dry  
356 season when water conditions are poorest and therefore most critical to fish. Unfenced

357 wetlands tended to be shallower, highly turbid, and most notably experience water  
358 temperatures that exceed acute thermal thresholds for fish [31]. The solubility of dissolved  
359 oxygen in water is strongly affected by temperature (i.e. high temperature reduces dissolved  
360 oxygen solubility [61]. Data on hypoxia tolerances of local freshwater fish species in northern  
361 Queensland is available [62], and while tolerances vary between species and life stages, there  
362 were obvious periods in wetlands when these threshold limits are exceeded. During the critical  
363 periods, fish must regulate breathing either via increasing ventilation rates [63], or by rising to  
364 the surface to utilise aquatic surface respiration and/or air gulping (e.g. tarpon, *Megalops*  
365 *cyprinoides*). In any case, the capacity for fish to do that safely depends on the timing of the  
366 oxygen sag and antecedent conditions, though notably it appears that most of the hypoxia-  
367 induced fish kills is actually due to exposure (e.g., thermal stress and sunburn) resulting from  
368 the animals' need to remain at the surface during the heat of the day in order to access available  
369 oxygen for respiration. Increasing these risks to fish can have important chronic effects  
370 including reducing physical fitness of fish to successfully contribute to future populations [64,  
371 65].

372 **Wetlands - A. M. G.**

769 The cultural and ecological value of coastal wetlands means that management intervention is  
770 increasingly necessary to ensure they remain productive and viable habitat (Creighton *et al.*,  
771 2015). These data support a model that damage to wetlands from pig activities not only  
772 contributes to reduced aquatic habitat, through loss of aquatic vegetation communities, but also  
773 probably has secondary impacts including water temperature and asphyxiation risks for many  
774 hours each day, that are higher than when compared to fenced wetlands (Figure 6). However,  
775 fish occupying fenced and unfenced wetlands here were similar, particularly in the late-dry  
776 season where those remaining few species were juveniles ready for wet season re-distribution.  
777 On this basis, installing fences to both floodplain and riverine wetlands that were not on the  
778 main flow channels, but rather were on anabranches and flood channels that connect to the

779 main channels only during high flow conditions, seems to offer little additional habitat value  
780 for fish. Where wetlands are largely ephemeral and will dry anyway, or where wetlands remain  
781 until the next seasons rain connection; species abundance and/or diversity is not improved by  
782 restricting feral pig access. Further research is necessary to examine climate change resilience  
783 on permanent wetlands (and managed wetlands) particularly whether they provide a similar  
784 level of refugia [66].

785

## 786 **Acknowledgements**

787 This project builds on a long-term feral animal management and monitoring program  
788 developed by Kalan enterprises and Aak Puul Ngangtam (APN) and their partners. Kalan and  
789 APN have developed their feral animal research and management agenda to meet the  
790 objectives of traditional owners in the region and have invited science organisations (CSIRO,  
791 James Cook University and the Department of Science and Environment) to contribute to the  
792 outcomes. APN and Kalan have conducted systematic feral pig control and monitoring in the  
793 Archer River basin for the past 6 years. We thank the reviewers who improved this manuscript  
794 considerably.

795

## 796 **Author Contributions**

797 NW conceived and designed the study, NW performed the data analysis. NW and JS  
798 completed fieldwork and prepared the manuscript.

799

## 800 **References**

- 801 1. Ambrose RF, Meffert DJ. Fish-assemblage dynamics in Malibu lagoon, a small, hydrologically  
802 altered estuary in southern California. *Wetlands*. 1999;19(2):327-40.  
803 2. Brandolin PG, Blendinger PG. Effect of habitat and landscape structure on waterbird  
804 abundance in wetlands of central Argentina. *Wetlands ecology and management*. 2016;24(1):93-105.



- 805 3. Jiang T-t, Pan J-f, Pu X-M, Wang B, Pan J-J. Current status of coastal wetlands in China:  
806 degradation, restoration, and future management. *Estuarine, Coastal and Shelf Science*. 2015;164:265-  
807 75.
- 808 4. Arrington DA, Winemiller KO. Habitat affinity, the seasonal flood pulse, and community  
809 assembly in the littoral zone of a Neotropical floodplain river. *Journal of the North American*  
810 *Benthological Society*. 2006;25(1):126-41.
- 811 5. Pander J, Mueller M, Geist J. Habitat diversity and connectivity govern the conservation value  
812 of restored aquatic floodplain habitats. *Biological Conservation*. 2018;217:1-10.
- 813 6. Hurd LE, Sousa RG, Siqueira-Souza FK, Cooper GJ, Kahn JR, Freitas CE. Amazon floodplain  
814 fish communities: Habitat connectivity and conservation in a rapidly deteriorating environment.  
815 *Biological Conservation*. 2016;195:118-27.
- 816 7. Bennett MG, Kozak JP. Spatial and temporal patterns in fish community structure and  
817 abundance in the largest US river swamp, the Atchafalaya River floodplain, Louisiana. *Ecology of*  
818 *freshwater fish*. 2016;25(4):577-89.
- 819 8. Galib SM, Lucas MC, Chaki N, Fahad FH, Mohsin A. Is current floodplain management a  
820 cause for concern for fish and bird conservation in Bangladesh's largest wetland? *Aquatic Conservation:*  
821 *Marine and Freshwater Ecosystems*. 2018.
- 822 9. Górski K, De Leeuw J, Winter H, Khoruzhaya V, Boldyrev V, Vekhov D, et al. The importance  
823 of flooded terrestrial habitats for larval fish in a semi-natural large floodplain (Volga, Russian  
824 Federation). *Inland Waters*. 2016;6(1):105-10.
- 825 10. Waltham N, Schaffer J. Thermal and asphyxia exposure risk to freshwater fish in  
826 feral-pig-damaged tropical wetlands. *Journal of fish biology*. 2018.
- 827 11. Blanchette ML, Davis AM, Jardine TD, Pearson RG. Omnivory and opportunism characterize  
828 food webs in a large dry-tropics river system. *Freshwater Science*. 2014;33(1):142-58.
- 829 12. Jardine TD, Pettit NE, Warfe DM, Pusey BJ, Ward DP, Douglas MM, et al. Consumer-resource  
830 coupling in wet-dry tropical rivers. *J Anim Ecol*. 2012;81(2):310-22. Epub 2011/11/23. doi:  
831 10.1111/j.1365-2656.2011.01925.x. PubMed PMID: 22103689.
- 832 13. Waltham N, Fixler S. Aerial Herbicide Spray to Control Invasive Water Hyacinth (*Eichhornia*  
833 *crassipes*): Water Quality Concerns Fronting Fish Occupying a Tropical Floodplain Wetland. *Tropical*  
834 *Conservation Science*. 2017;10:1940082917741592.
- 835 14. Weinstein MP, Litvin SY. Macro-Restoration of Tidal Wetlands: A Whole Estuary Approach.  
836 *Ecological Restoration*. 2016;34(1):27-38.
- 837 15. Zedler JB. What's New in Adaptive Management and Restoration of Coasts and Estuaries?  
838 *Estuaries and Coasts*. 2016:1-21.
- 839 16. Pusey BJ, Arthington AH. Importance of the riparian zone to the conservation and management  
840 of freshwater fish: a review. *Marine and Freshwater Research*. 2003;54:1-16.
- 841 17. McJannet D, Marvanek S, Kinsey-Henderson A, Petheram C, Wallace J. Persistence of in-  
842 stream waterholes in ephemeral rivers of tropical northern Australia and potential impacts of climate  
843 change. *Marine and Freshwater Research*. 2014.
- 844 18. Pettit N, Jardine T, Hamilton S, Sinnamon V, Valdez D, Davies P, et al. Seasonal changes in  
845 water quality and macrophytes and the impact of cattle on tropical floodplain waterholes. *Marine and*  
846 *Freshwater Research*. 2012;63(9):788-800.
- 847 19. Petheram C, McMahon TA, Peel MC. Flow characteristics of rivers in northern Australia:  
848 implications for development. *Journal of Hydrology*. 2008;357(1):93-111.
- 849 20. Wallace J, Waltham N, Burrows D. A comparison of temperature regimes in dry-season  
850 waterholes in the Flinders and Gilbert catchments in northern Australia. *Marine and Freshwater*  
851 *Research*. 2017;68(4):650-67.
- 852 21. Burrows D, Butler B. Primary studies of temperature regimes and temperature tolerance of  
853 aquatic fauna in freshwater habitats of northern Australia. Australian Centre of Tropical Freshwater  
854 Research (12/01): James Cook University, Townsville, 2012 Contract No.: 12/01.
- 855 22. Wallace J, Waltham NJ, Burrows DW, McJannet D. The temperature regimes of dry-season  
856 waterholes in tropical northern Australia: potential effects on fish refugia. *Freshwater Science*.  
857 2015;34(2):663-78.
- 858 23. Waltham NJ. Acute thermal effects in an inland freshwater crab *Austrothelphusa transversa*  
859 (von Martens, 1868) occupying seasonal, tropical rivers. *Journal of Crustacean Biology*. 2018.

- 860 24. Love S, Phelps Q, Tripp S, Herzog D. The importance of shallow-low velocity habitats to  
861 juvenile fish in the middle Mississippi River. *River Research and Applications*. 2017;33(3):321-7.
- 862 25. Phelps QE, Tripp SJ, Herzog DP, Garvey JE. Temporary connectivity: the relative benefits of  
863 large river floodplain inundation in the lower Mississippi River. *Restoration Ecology*. 2015;23(1):53-6.
- 864 26. Schomaker C, Wolter C. The contribution of long-term isolated water bodies to floodplain fish  
865 diversity. *Freshwater Biology*. 2011;56(8):1469-80.
- 866 27. Baber DW, Coblenz BE. Density, home range, habitat use, and reproduction in feral pigs on  
867 Santa Catalina Island. *Journal of Mammalogy*. 1986;67(3):512-25.
- 868 28. Krull CR, Choquenot D, Burns BR, Stanley MC. Feral pigs in a temperate rainforest  
869 ecosystem: disturbance and ecological impacts. *Biological Invasions*. 2013;15(10):2193-204.
- 870 29. Ballari SA, Barrios-Garcia MN. A review of wild boar *Sus scrofa* diet and factors affecting  
871 food selection in native and introduced ranges. *Mammal Review*. 2014;44(2):124-34.
- 872 30. Doupe RG, Mitchell J, Knott MJ, Davis AM, Lymbery AJ. Efficacy of exclusion fencing to  
873 protect ephemeral floodplain lagoon habitats from feral pigs (*Sus scrofa*). *Wetlands Ecology and*  
874 *Management*. 2010;18(1):69-78.
- 875 31. Waltham NJ, Schaffer JR. Thermal and asphyxia exposure risk to freshwater fish in  
876 feral-pig-damaged tropical wetlands. *Journal of Fish Biology*. 2018;93(4):723-8.
- 877 32. Doupe RG, Mitchell J, Knott MJ, Davis AM, Lymbery AJ. Efficacy of exclusion fencing to  
878 protect ephemeral floodplain lagoon habitats from feral pigs (*Sus scrofa*). *Wetlands Ecology*  
879 *Management*. 2010;18:69-78.
- 880 33. Mitchell J, Mayer R. Diggings by feral pigs within the Wet Tropics World Heritage Area of  
881 north Queensland. *Wildlife Research*. 1997;24(5):591-601.
- 882 34. Steward AL, Negus P, Marshall JC, Clifford SE, Dent C. Assessing the ecological health of  
883 rivers when they are dry. *Ecological Indicators*. 2018;85:537-47.
- 884 35. Australia Co. Threat abatement plan for predation, habitat degradation, competition and disease  
885 transmission by feral pigs (*Sus scrofa*) (2017) — Background Document. Canberra: Department of  
886 Environment and Energy, 2017.
- 887 36. Fordham D, Georges A, Corey B, Brook BW. Feral pig predation threatens the indigenous  
888 harvest and local persistence of snake-necked turtles in northern Australia. *Biological Conservation*.  
889 2006;133(3):379-88.
- 890 37. Ross B, Waltham NJ, Schaffer J, Jaffer T, Whyte S, Perry J, et al. Improving biodiversity  
891 outcomes and carbon reduction through feral pig abatement. Cairns: Balkanu Cape York Development  
892 Corporation Ltd Pty, 2017.
- 893 38. Waltham N, Schaffer J. Continuing aquatic assessment of wetlands with and without feral pig  
894 and cattle fence exclusion, Archer River catchment. 2017.
- 895 39. Waltham N, Schaffer J. Continuing aquatic assessment of wetlands with and without feral pig  
896 and cattle fence exclusion, Archer River catchment. Townsville Australia: TropWATER James Cook  
897 University, 2017 17/04.
- 898 40. Gongora J, Fleming P, Spencer PB, Mason R, Garkavenko O, Meyer J-N, et al. Phylogenetic  
899 relationships of Australian and New Zealand feral pigs assessed by mitochondrial control region  
900 sequence and nuclear GPIP genotype. *Molecular Phylogenetics and Evolution*. 2004;33(2):339-48.
- 901 41. Lopez J, Hurwood D, Dryden B, Fuller S. Feral pig populations are structured at fine spatial  
902 scales in tropical Queensland, Australia. *PloS one*. 2014;9(3):e91657.
- 903 42. Quinn GP, Keough MJ. *Experimental design and data analysis for biologists*: Cambridge  
904 University Press; 2002.
- 905 43. Clarke KR. Non-parametric multivariate analyses of changes in community structure.  
906 *Australian Journal of Ecology*. 1993;18:117-43.
- 907 44. De'Ath G. Multivariate regression trees: a new technique for modeling species–environment  
908 relationships. *Ecology*. 2002;83(4):1105-17.
- 909 45. Sheaves M, Johnston R. Ecological drivers of spatial variability among fish fauna of 21 tropical  
910 Australian estuaries. *Marine Ecology Progress Series*. 2009;385:245-60.
- 911 46. Bariyanga JD, Wronski T, Plath M, Apio A. Effectiveness of electro-fencing for restricting the  
912 ranging behaviour of wildlife: a case study in the degazetted parts of Akagera National Park. *African*  
913 *zoology*. 2016;51(4):183-91.

- 914 47. Arthington AH, Godfrey PC, Pearson RG, Karim F, Wallace J. Biodiversity values of remnant  
915 freshwater floodplain lagoons in agricultural catchments: evidence for fish of the Wet Tropics  
916 bioregion, northern Australia. *Aquatic Conservation: Marine and Freshwater Ecosystems*.  
917 2015;25(3):336-52.
- 918 48. Barko VA, Herzog DP, O'Connell MT. Response of fishes to floodplain connectivity during  
919 and following a 500-year flood event in the unimpounded upper Mississippi River. *Wetlands*.  
920 2006;26(1):244-57.
- 921 49. Chacin DH, Giery ST, Yeager LA, Layman CA, Langerhans RB. Does hydrological  
922 fragmentation affect coastal bird communities? A study from Abaco Island, The Bahamas. *Wetlands*  
923 *ecology and management*. 2015;23(3):551-7.
- 924 50. Robertson EP, Fletcher RJ, Austin JD. The Causes of Dispersal and the Cost of Carryover  
925 Effects for an Endangered Bird in a Dynamic Wetland Landscape. *Journal of Animal Ecology*. 2017.
- 926 51. Żmihorski M, Pärt T, Gustafson T, Berg Å. Effects of water level and grassland management  
927 on alpha and beta diversity of birds in restored wetlands. *Journal of applied ecology*. 2016;53(2):587-  
928 95.
- 929 52. Buelow CA, Baker R, Reside AE, Sheaves M. Nutrient subsidy indicators predict the presence  
930 of an avian mobile-link species. *Ecological Indicators*. 2018;89:507-15.
- 931 53. Ma Z, Cai Y, Li B, Chen J. Managing wetland habitats for waterbirds: an international  
932 perspective. *Wetlands*. 2010;30(1):15-27.
- 933 54. Swanson HK, Lysy M, Power M, Stasko AD, Johnson JD, Reist JD. A new probabilistic  
934 method for quantifying n-dimensional ecological niches and niche overlap. *Ecology*. 2015;96(2):318-  
935 24.
- 936 55. Jackson AL, Inger R, Parnell AC, Bearhop S. Comparing isotopic niche widths among and  
937 within communities: SIBER—Stable Isotope Bayesian Ellipses in R. *Journal of Animal Ecology*.  
938 2011;80(3):595-602.
- 939 56. Pusey BJ, Kennard MJ, Douglas M, Allsop Q. Fish assemblage dynamics in an intermittent  
940 river of the northern Australian wet-dry tropics. *Ecology of Freshwater Fish*. 2018;27(1):78-88.
- 941 57. King A, Humphries P, Lake P. Fish recruitment on floodplains: the roles of patterns of flooding  
942 and life history characteristics. *Canadian Journal of Fisheries and Aquatic Sciences*. 2003;60(7):773-86.
- 943 58. Godfrey PC, Arthington AH, Pearson RG, Karim F, Wallace J. Fish larvae and recruitment  
944 patterns in floodplain lagoons of the Australian Wet Tropics. *Marine and Freshwater Research*. 2016:-.  
945 doi: <https://doi.org/10.1071/MF15421>.
- 946 59. Pusey BJ, Bird JR, Close AH, Arthington AH. Reproduction in three species of rainbowfish  
947 (*Melanotaeniidae*) in rainforest streams of north-eastern Queensland. *Ecology of Freshwater Fish*.  
948 2001;10:75-87.
- 949 60. Stewart-Koster B, Olden J, Kennard M, Pusey B, Boone E, Douglas M, et al. Fish response to  
950 the temporal hierarchy of the natural flow regime in the Daly River, northern Australia. *Journal of Fish*  
951 *Biology*. 2011;79(6):1525-44.
- 952 61. Diaz RJ, Breitburg DL. The hypoxic environment. *Fish physiology*. 2009;27:1-23.
- 953 62. Butler B, Burrows DW. Dissolved oxygen guidelines for freshwater habitats of northern  
954 Australia. . James Cook University, Townsville: Australian Centre for Tropical Freshwater Research  
955 (07/31), 2007 Contract No.: 07/31.
- 956 63. Collins GM, Clark TD, Rummer JL, Carton AG. Hypoxia tolerance is conserved across  
957 genetically distinct sub-populations of an iconic, tropical Australian teleost (*Lates calcarifer*).  
958 *Conservation physiology*. 2013;1(1):cot029.
- 959 64. Flint N, Pearson RG, Crossland MR. Reproduction and embryo viability of a range-limited  
960 tropical freshwater fish exposed to fluctuating hypoxia. *Marine and Freshwater Research*.  
961 2018;69(2):267-76.
- 962 65. Gilmore KL, Doubleday ZA, Gillanders BM. Testing hypoxia: physiological effects of long-  
963 term exposure in two freshwater fishes. *Oecologia*. 2018;186(1):37-47.
- 964 66. James CS, Reside AE, VanDerWal J, Pearson RG, Burrows D, Capon SJ, et al. Sink or swim?  
965 Potential for high faunal turnover in Australian rivers under climate change. *Journal of Biogeography*.  
966 2017.
- 967 67. Pusey BJ, Burrows DW, Kennard MJ, Perna CN, Unmack PJ, Allsop Q, et al. Freshwater fishes  
968 of northern Australia. *Zootaxa*. 2017;4253(1):1-104.



## 1 List of Figures

2 Fig 1. Location of wetlands in this study: a) location of the Archer River catchment in northern  
3 Queensland, Australia and b) wetland sites on the coastal floodplain and mid catchment where  
4 feral pig fencing has been completed around wetlands preventing access (yellow circles). The  
5 three wetland typologies (C – pig impacted wetlands that are shallow (typically <0.5m deep),  
6 without submerged aquatic vegetation, turbid and eutrophic; D – fenced wetland preventing pig  
7 access that are deeper (typically <2m deep), clear with submerged aquatic vegetation present)  
8 exist across the catchment, and E – permanent wetlands that are deeper (typically <2m deep),  
9 steep sides limiting pig access, clear with submerged aquatic vegetation present. Archer River  
10 gauge station (red circle).

bioRxiv preprint doi: <https://doi.org/10.1101/625053>; this version posted May 1, 2019. The copyright holder for this preprint (which was not certified by peer review) is the author/funder, who has granted bioRxiv a license to display the preprint in perpetuity. It is made available under aCC-BY 4.0 International license.

11  
12 Fig 2. Daily discharge at the Archer River roadhouse gauge (Figure 1) before and during  
13 (dashed insert box) this study. Sampling occasions (arrows) are indicated. Data provided by  
14 the Queensland Government.

15  
16 Fig 3. Examples of the diel dissolved oxygen, pH, water temperature and conductivity cycling  
17 in Archer River wetlands. These examples are from KA06 during post-wet season (a), and  
18 late-dry season (b) in 2016, and AR01 during post wet season (c) and late-dry season (d) in  
19 2016.

20  
21 Fig 4. Multivariate regression tree showing the major divisions in the database on assemblage  
22 composition. Each of the splits are labelled with the contributing variable, and the division  
23 threshold (in the case of electronic conductivity; EC, and dissolved oxygen; DO). The length  
24 of the descending branches is proportional to the divergence between groups. Bar plots  
25 represent the fish assemblage composition at the corresponding colour code node sharing the

26 same attributes. Values in the bar plots represent the relative frequencies of occurrence of each  
27 taxon within a same node.

28

29 Fig 5. Pooled fish length (standard length, mm) frequency comparison of (a) 2016, (b) 2017  
30 and (c) 2018. Comparison for *Mogurnda mogurnda* (d) post wet season; and (e) late-dry  
31 season (years combined).

32

bioRxiv preprint doi: <https://doi.org/10.1101/625053>; this version posted May 1, 2019. The copyright holder for this preprint (which was not certified by peer review) is the author/funder, who has granted bioRxiv a license to display the preprint in perpetuity. It is made available under aCC-BY 4.0 International license.

33 Fig 6. Conceptual diagram of wetland ecosystem conditions during (a) wet season, and (b)

34 late-dry season. During the wet season, the lateral connection between the Archer River  
35 channel and wetlands occurs, during which fish can access wetlands and water quality is  
36 generally best because feral pig impact is minimal regardless of fencing. The dry season  
37 results in water retracting from the land margins, allowing pigs to access unfenced wetlands.  
38 At this stage, water quality conditions are poor in unfenced wetlands with high  
39 turbidity/nutrients and temperature, and dissolved oxygen is generally critical for fish. Fenced  
40 wetlands become shallower too, through temperature and dissolved oxygen cycling reduced,  
41 turbidity is low, while nutrients can be also high. Regardless of fencing, fish community  
42 reduced to a few resilient species dominated by juveniles ready for rapid dispersal when wet  
43 seasons commences again.

44

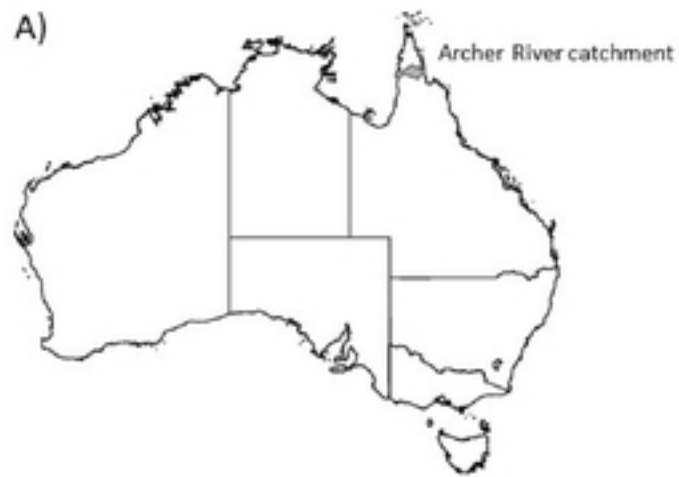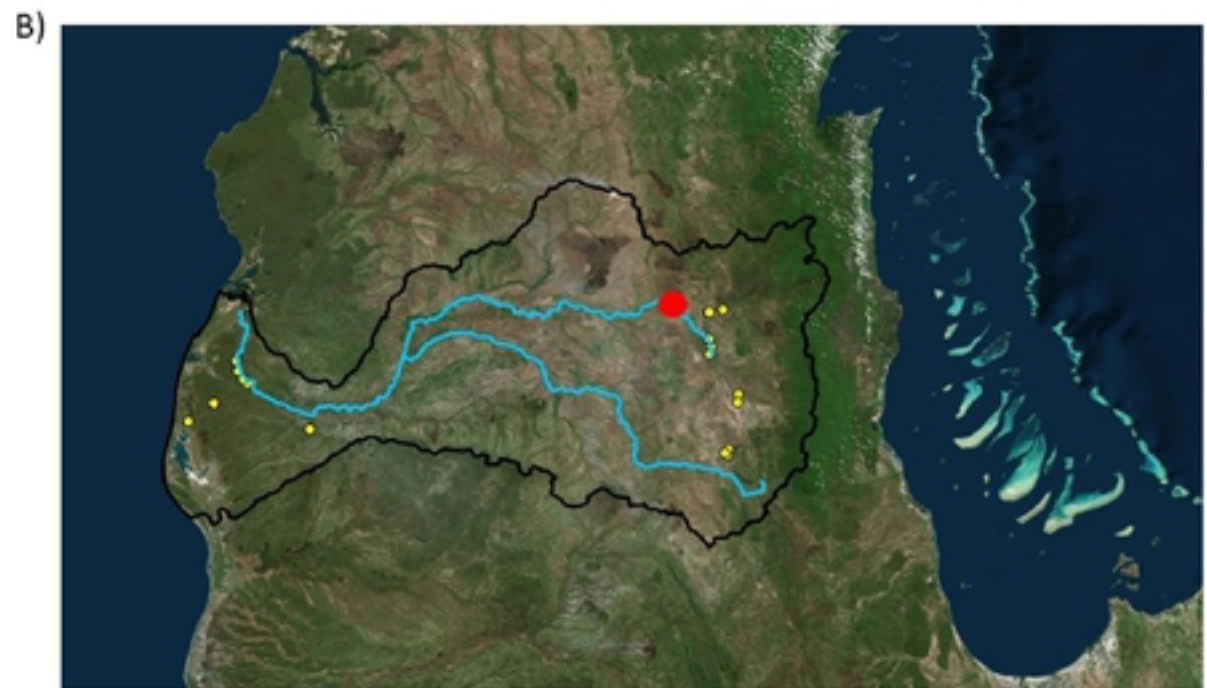

D) unfenced wetland

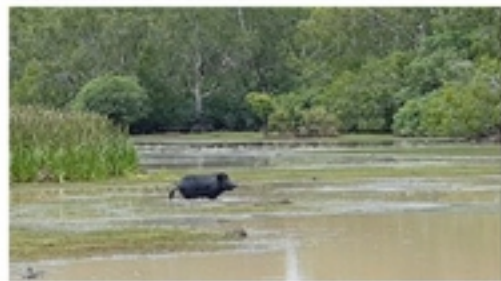

E) fenced wetland

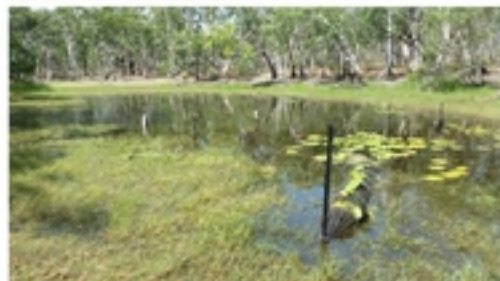

F) persistent wetland

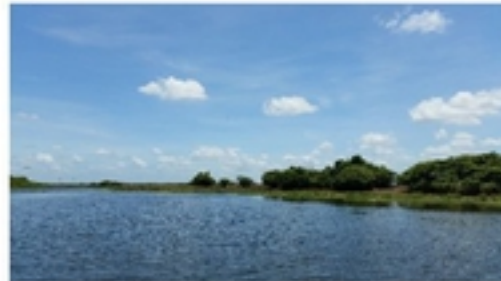

45

46 Fig 1.



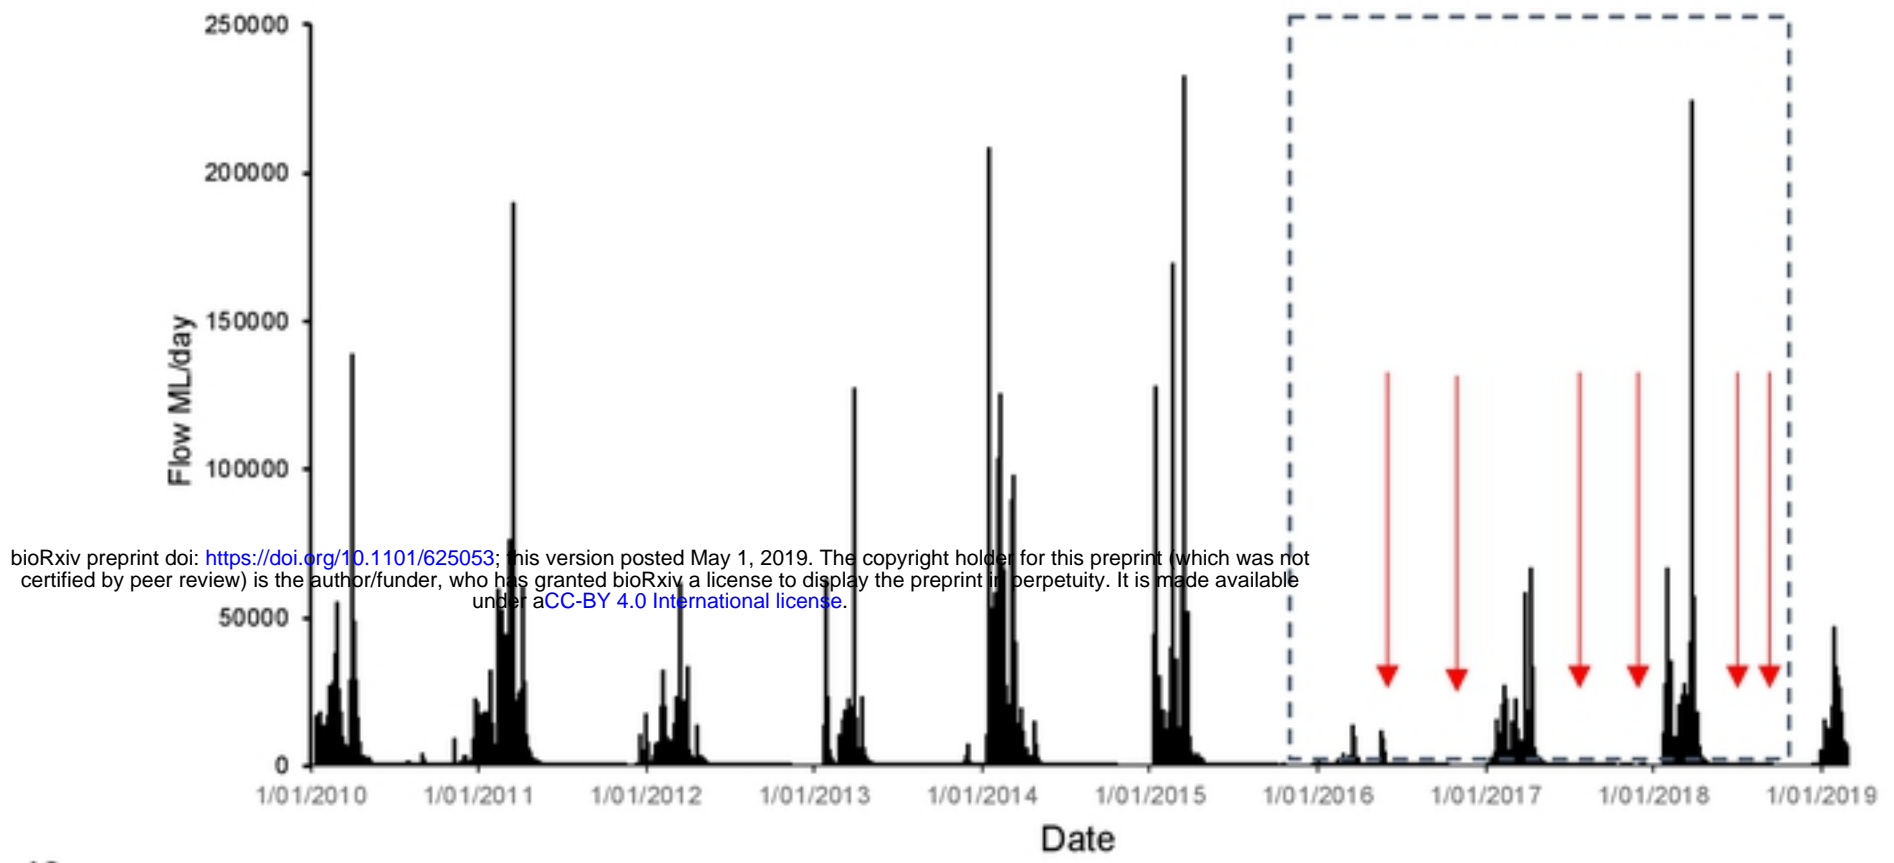

48

49

50 Fig 2

51

52

A)

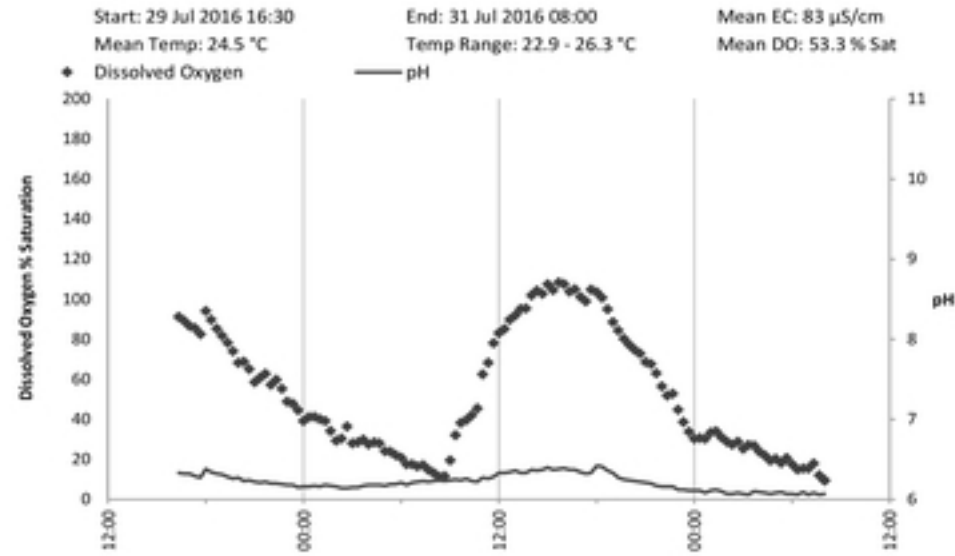

B)

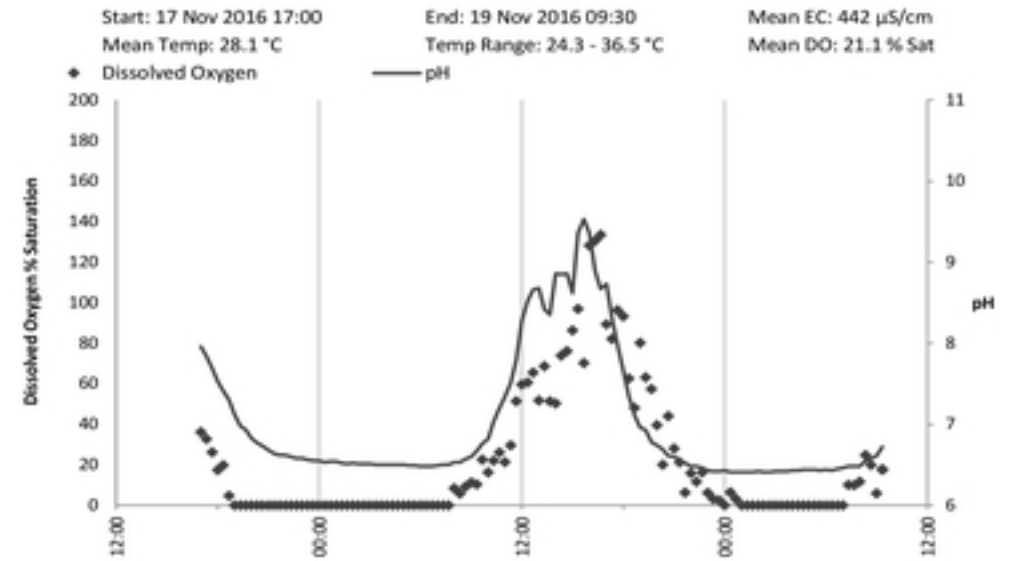



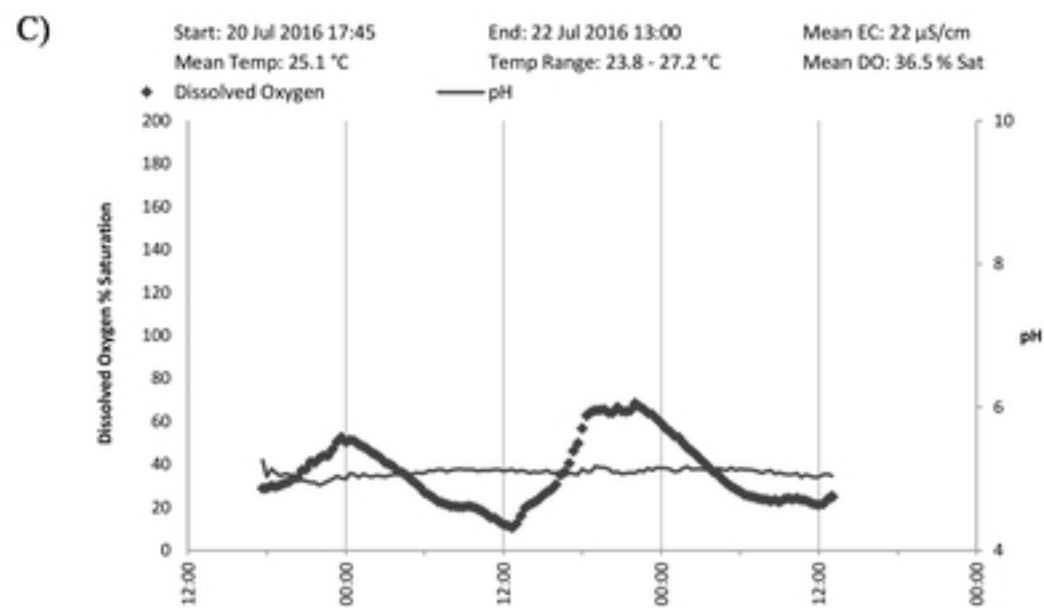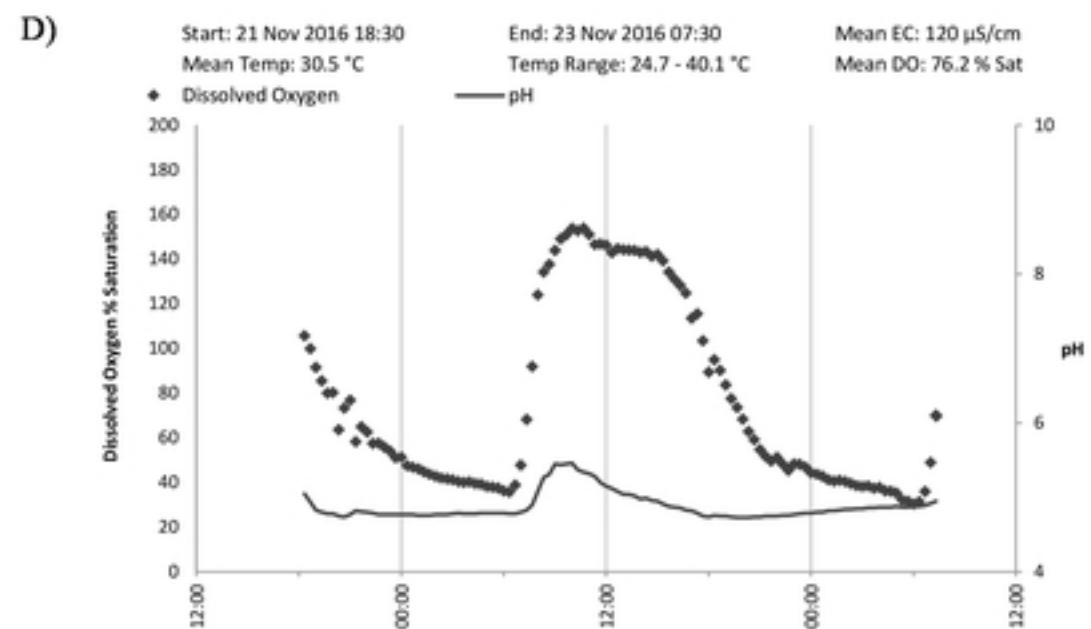

53 Fig 3.

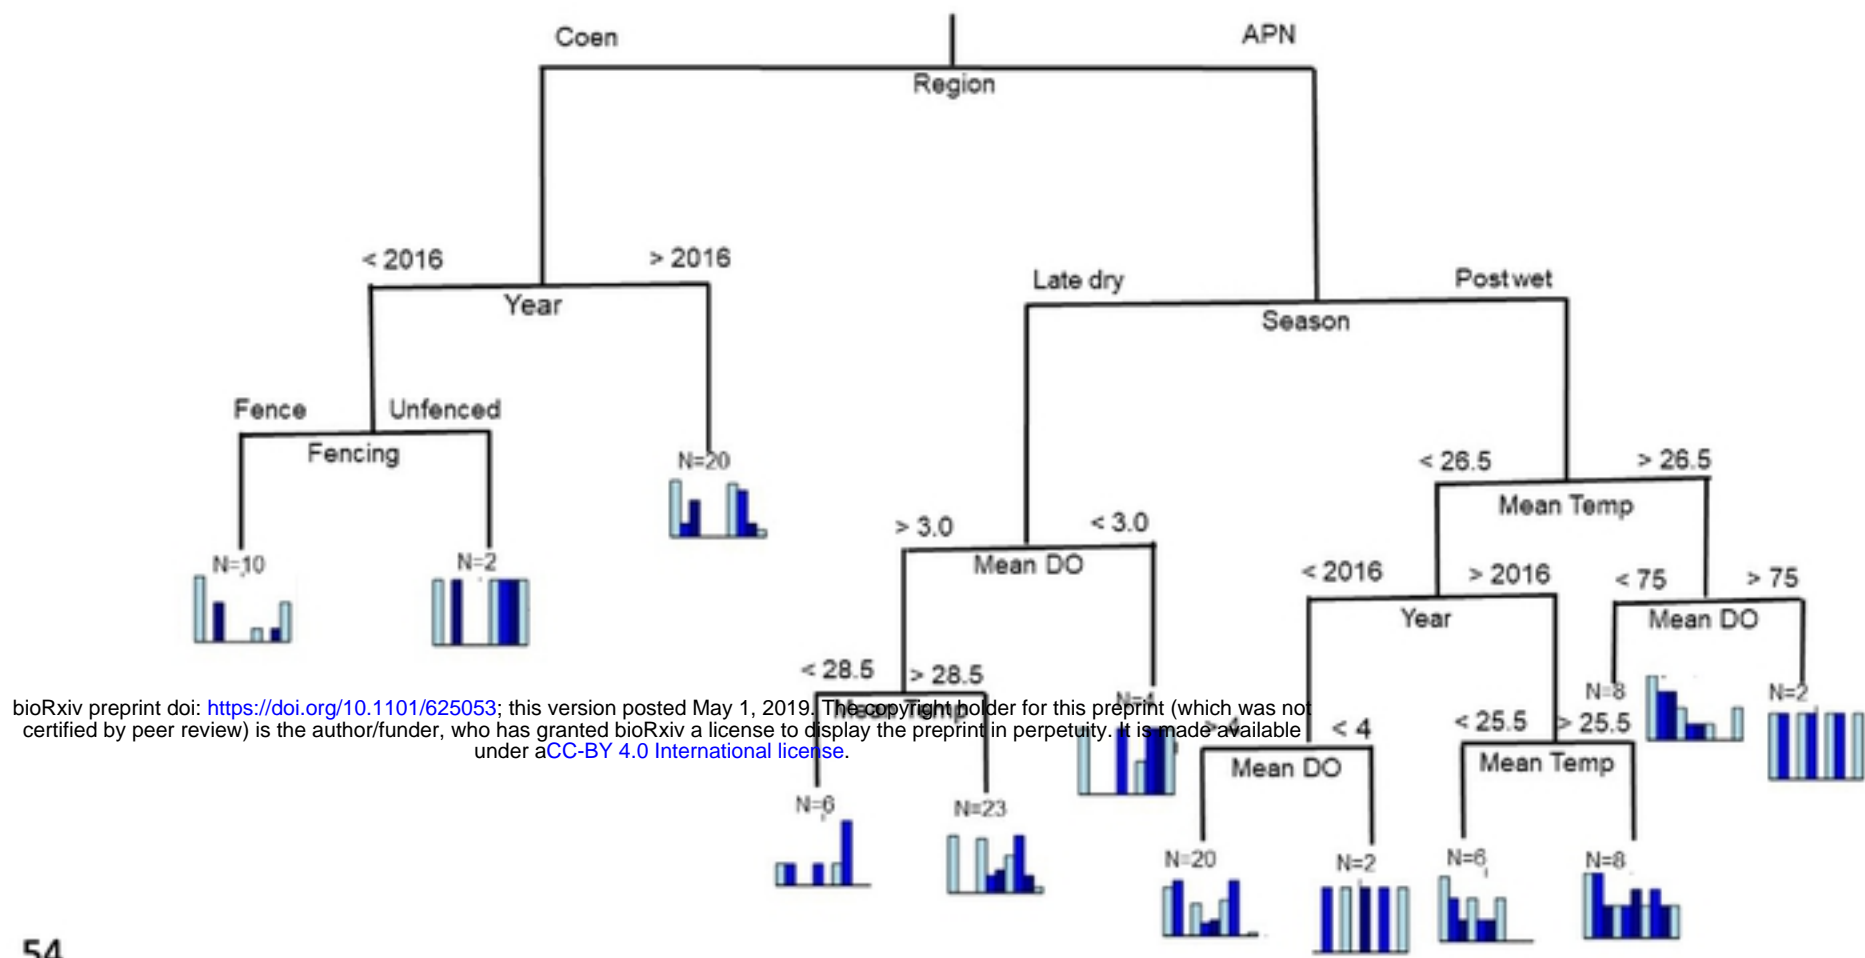

54

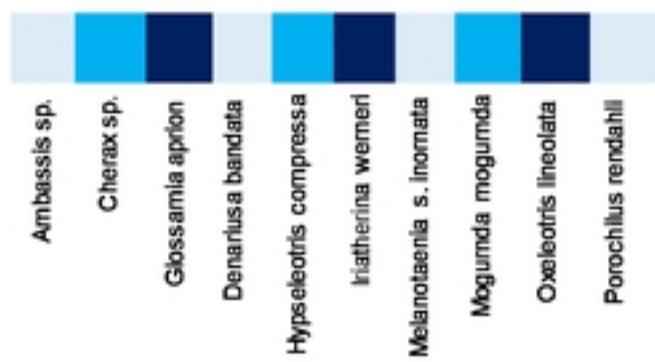

55

56

57 Fig 4.

58

59

60

61

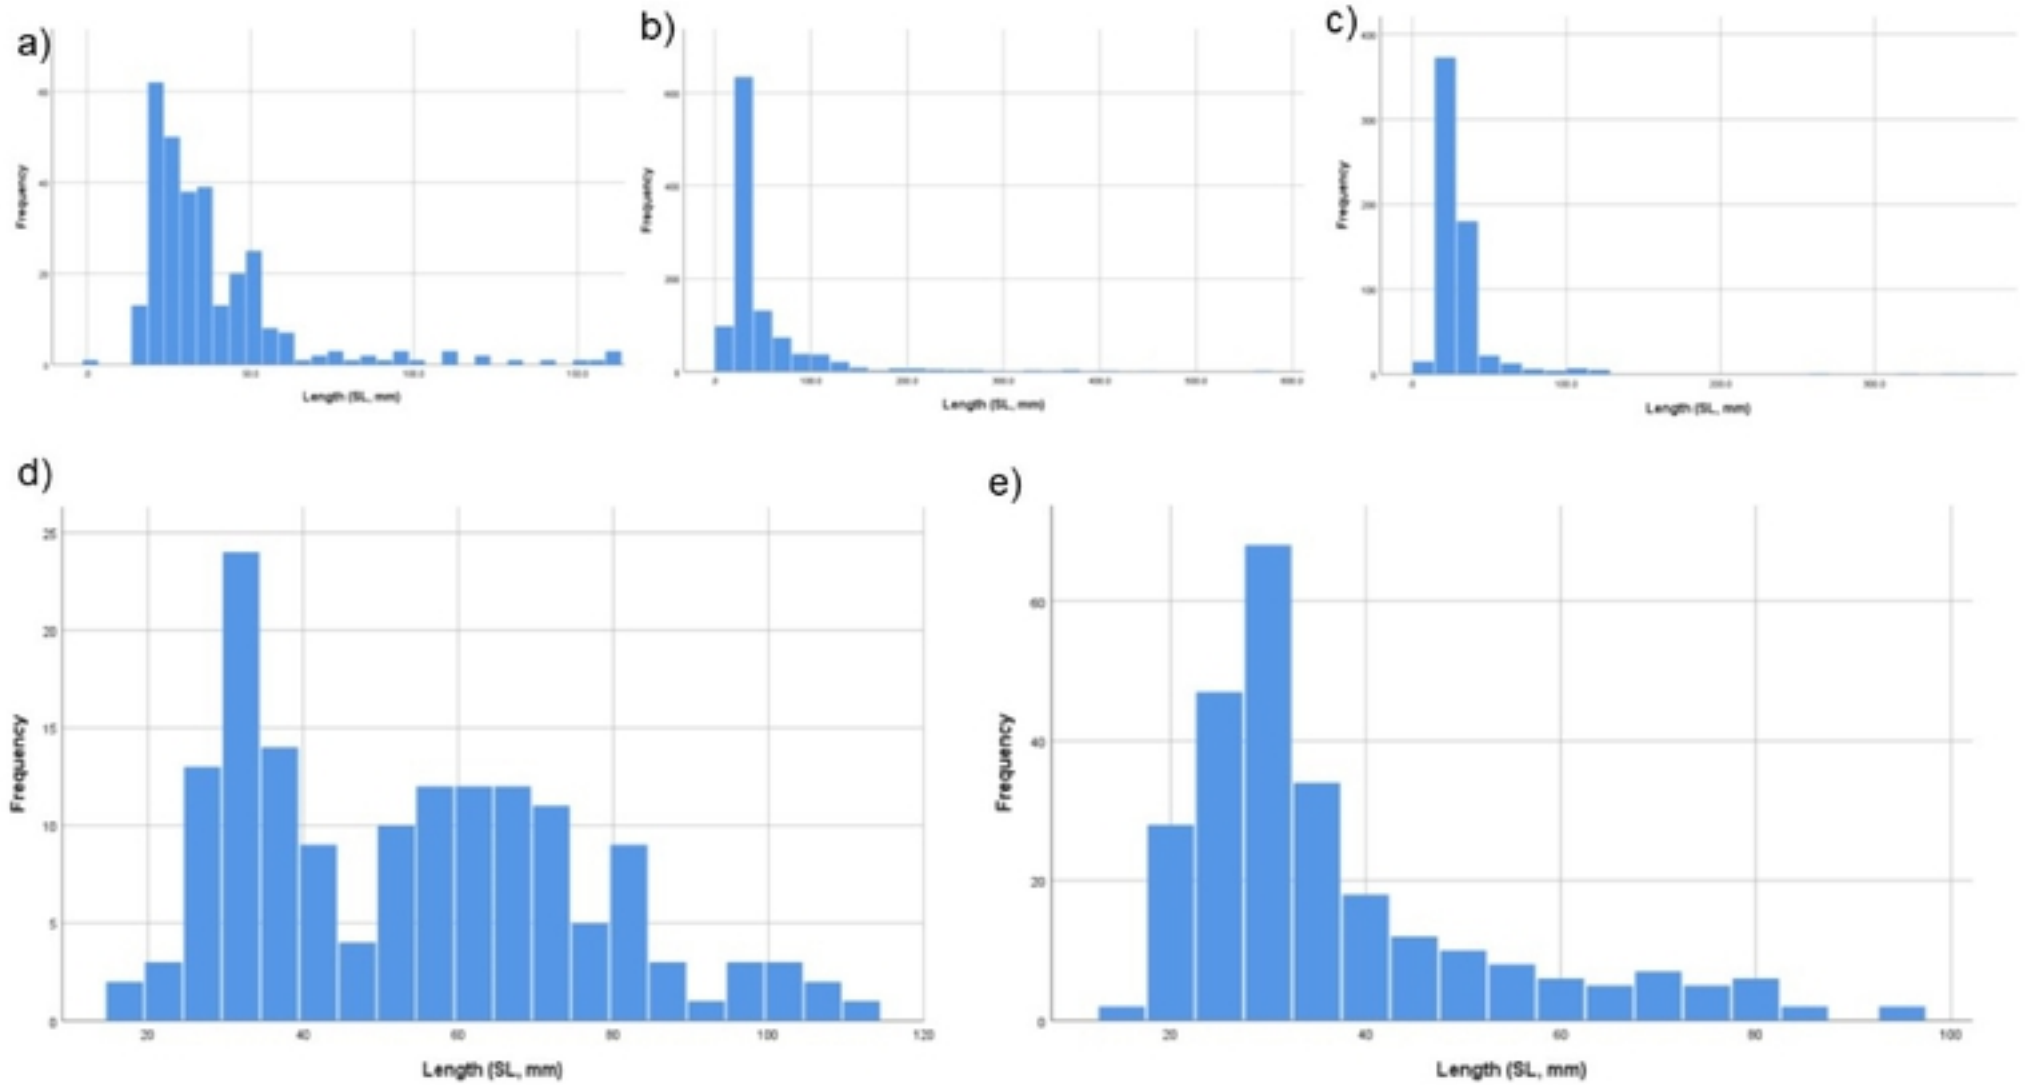

62

63

64 Fig 5.

A)

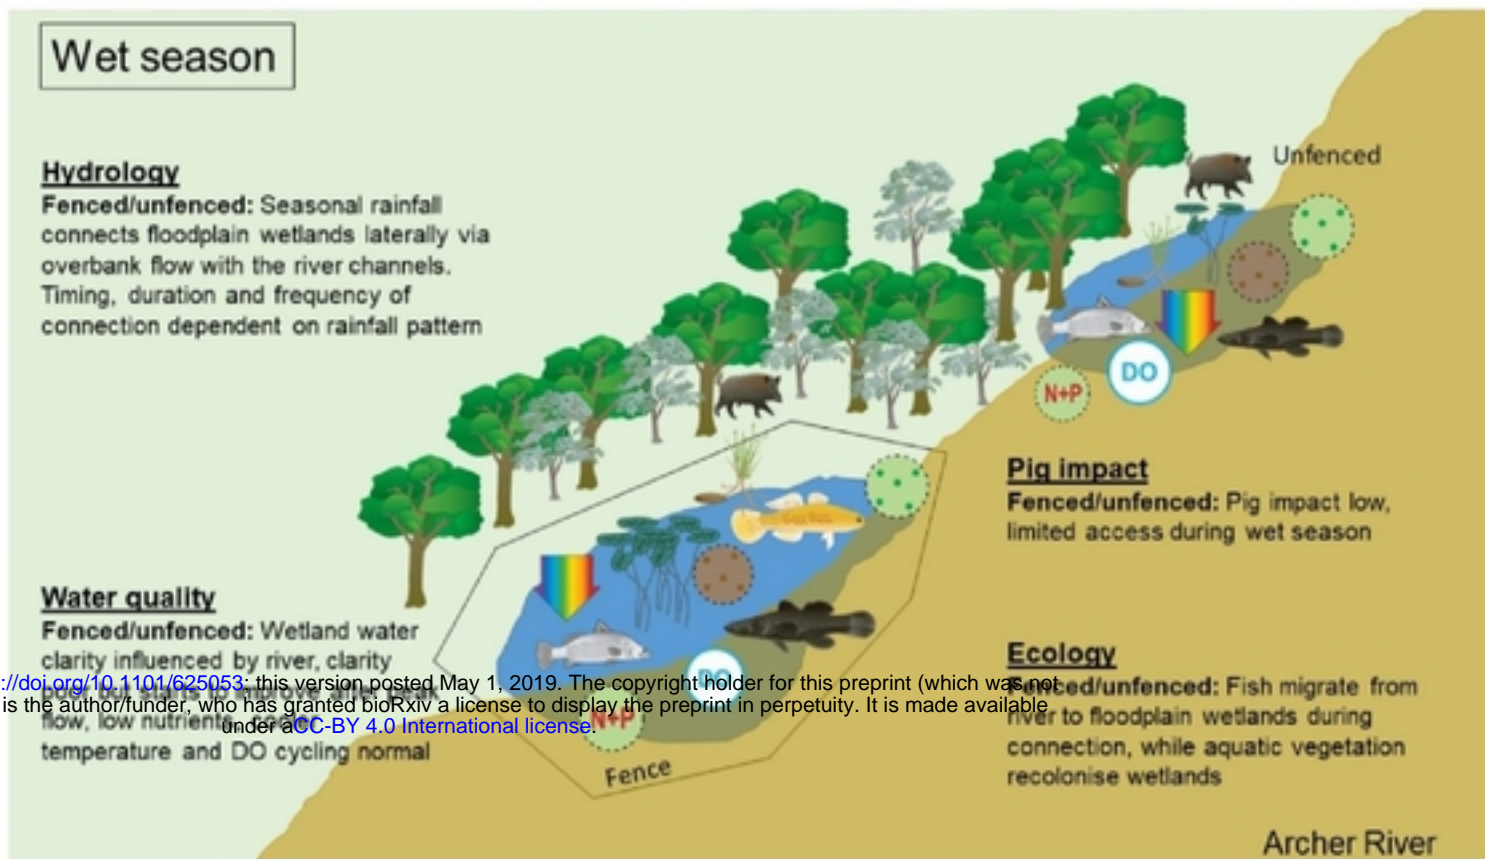

bioRxiv preprint doi: <https://doi.org/10.1101/625053>; this version posted May 1, 2019. The copyright holder for this preprint (which was not certified by peer review) is the author/funder, who has granted bioRxiv a license to display the preprint in perpetuity. It is made available under aCC-BY 4.0 International license.

B)

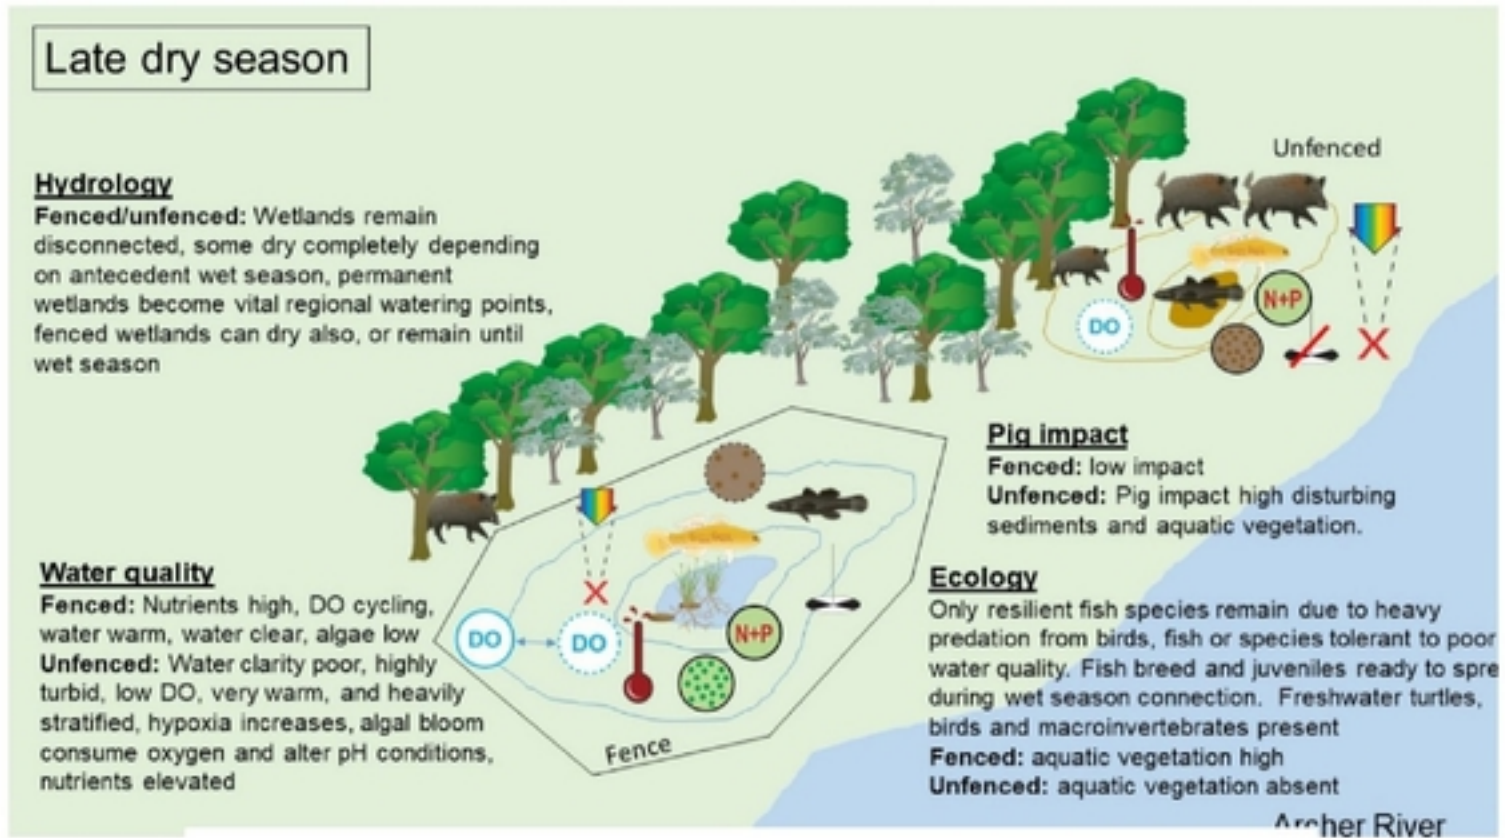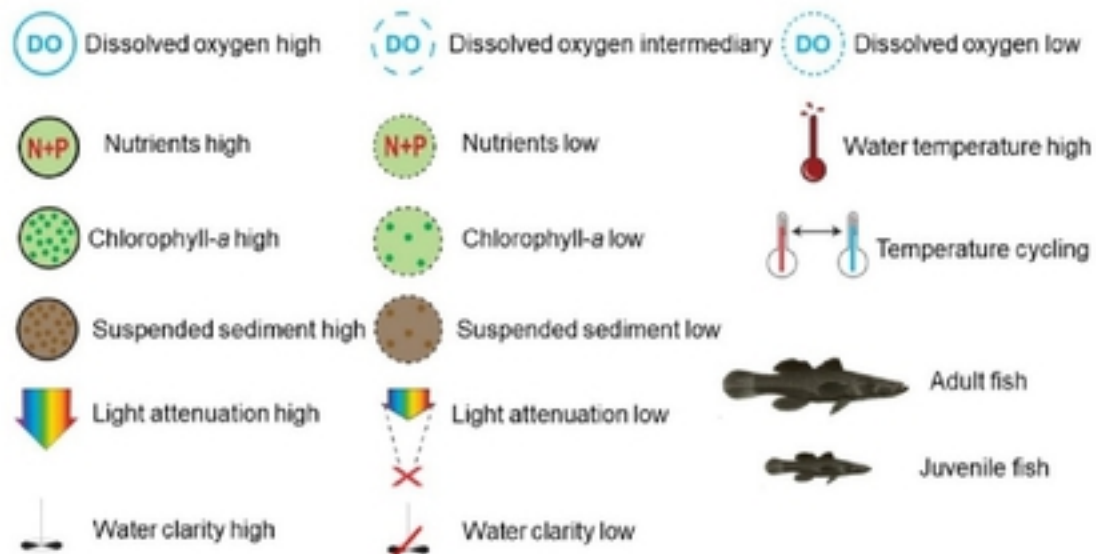

Fig. 6.
